# Supplementary material
Source: Springer Nature journal article supplement (https://www.springermedizin.de/resource/supplementary/12986_2009_228_MOESM1_ESM.pdf/25655632)
Supplement: MOESM1 [file 25655632]

US Food Commodity List [27]

```
graph TD; A[US Food Commodity List [27]] --> B[Identify Potential Fructose-containing Commodities from the List (such as fruits, vegetables, honey, sugars, etc.)]; B --> C[Using Nutrient Database SR20 [28], Define Fructose Content for the Commodities Directly or Indirectly]; C --> D[Using EPA Food Commodity Composition Database [27], Identify Fructose-Containing Food]; D --> E[Using USDA Sweetener Data [29] and EPA Food Commodity Composition Database [27], Differentiate Fructose Sources]; E --> F[Merge the Fructose Content Values into NHANES 1999-2004 Food Intake Data Set]; F --> G[Calculate Fructose Intakes for the Individuals Studied];
```

Identify Potential Fructose-containing Commodities from the List (such as fruits, vegetables, honey, sugars, etc.)

Using Nutrient Database SR20 [28], Define Fructose Content for the Commodities Directly or Indirectly

Using EPA Food Commodity Composition Database [27], Identify Fructose-Containing Food

Using USDA Sweetener Data [29] and EPA Food Commodity Composition Database [27], Differentiate Fructose Sources

Merge the Fructose Content Values into NHANES 1999-2004 Food Intake Data Set

Calculate Fructose Intakes for the Individuals Studied
